# Supplementary material for: A SIX1 homolog in Fusarium oxysporum f.sp. cubense tropical race 4 contributes to virulence towards Cavendish banana
Source: PLoS One. 2018 Oct 22;13(10):e0205896. doi: 10.1371/journal.pone.0205896 (PMC6197647; doi:10.1371/journal.pone.0205896)
Supplement: S2 Table — (XLSX) [file pone.0205896.s005.xlsx]

## Sheet: Sheet1
Isolate	SIX1 homolog	gene id	Genbank genome assembly accession	contig or scaffold	coordinate 1	coordinate 2	strand	Genomic DNA sequence
F. oxysporum Fo5176	-	FOXB_02007	GCA_000222805.1	scaffold 1.62	2062	2901	-	ATGGCGCCCTATAGCATGGTACTCCTTGGCGCTCTCTCAATCCTTGGGTTTGGGGCTTATGCTCAAGAGGCTGCGGTTGGGGAACCCCAGGTATTTTTCAACTTGACCTTCACGGAATACCTGGATAAGGTGGCAGCATCCAAGGGGAGTCCCCAAGACATTGGTTTGCCCCGGAATGACACTATGGGCAGCTTTCCTGGGAACGAGACGGGCAGCAGCCTATCGAGGCGTGGTCGCATCGTCAACCTTAGAAAGCGTGCTCCTGTCGAAGGGGAGGATCGCAATGATCATGTCACCAATGACATGCTCCAGGCGCTTCATGATATGTGCGTTGAAAGATTTGGCGCAGGCCATCGAGCGACTAGTGGGTTATGTCGCCCTGAGCGTCGGGCGACTAGG…
F. oxysporum f. sp. cubense B2 (race 4)	A	FOC4_g10000240	GCA_000350365.1	scaffold 32	31949	32782	+	ATGGCGCCCTATAGCATGGTACTCCTTGGCGCCCTCTCAATCCTTGGGTTTGGGGCTTATGCTCAAGAGGCTGCGGTTGAGGAACCCCAGATATTTTTCAACTTGACCTACACGGAATATCTGGATAAGGTGGCAGCATCCCACGGGAGTTCCCAGACGAGTGATTTGCCGTGGAATGACACTATGAGCGGCTTTCCTGGGAACGAGACGGGCAGCAGCCTATCGAGGCGTGGTCGCATTGTCAACCTTGGAAAGCGTGACCCTGTCGGCGGGGAGGCTTTCAATGATCGTGTCACCAATGACATGCTCCAGGCGCTTCATGGTCTCTGCGTTGAAAATTTTGGCACAGGCTTTCGAGCGACTAATGGGTACTGTCGCGCTAACCGTCGGGCGACTAGG…
F. oxysporum f. sp. cubense B2 (race 4)	B	FOC4_g10000575	GCA_000350365.1	scaffold 248	3131	3958	-	ATGGCGCCCTATAGCATGGTACTCCTTGGCGCCCTCTCAATCCTTGGGTTTGGGGCTTATGCTCAAGAGGCTGCGGTTGAGGAACCCCAGATATTTTTCAACTTGACCTACACGGAATATCTGGATAAGGTGGCAGCATCCCACGGGAGTTCCCAGACGAGTGATTTGCCGTGGAATGACACTATGAGCGGCTTTCCTGGGAACGAGACGGGCAGCAGCCTATCGAGGCGTGGTCGCATTGTCAACCTTGGAAAGCGTGACCCTGTCGGCGGGGAGGCTCACAACAATCGCGTCACCAATGACATGCTCCAGGCGCTTCATGATCTGTGTGTTGAAGCATATGGCACAGGCTGGCGAGCGATTAGTGGGTCGTGTCAAGACCAGGCAACGAGGCGTATC…
F. oxysporum f. sp. cubense B2 (race 4)	C	FOC4_g10000324	GCA_000350365.1	scaffold 101	35438	36277	-	ATGGCGCCTTATGGCATAGTACTCCTCGGCATCCTCTCAATCCTTGGGTCGGCGGCTTATGCTCAAGAGGCTGCAGTTCAGGAACCCCAGGTATTTTTCAACTTAACCTATGATGAATATCTGGATAAGGTGGCAGCATCTTCTGGGAGTGTCCCAGATAACAGTGATTTGCCCTGGGATGACACTATGAGCAGCCTTCCTTCAAACGAGACGTACGATAGTGTTCAGACCGAGACGAGCAGCAGCCTATCGAGGCGTGGTCGCGTTTTCAATCTCGGAAAGCGTGAGCCTGTCGGCGGGGAGACTCAAAACGATCAGGTCACCAATGATATGCTCCAGGCGCTTCATGGTCTGTGTGTTGAAAAATATGGCACAGGCTGGCGAGCGGTTAGTGGGATA…
F. oxysporum f. sp. cubense II5 (race TR4)	A	FOIG_16556	GCA_000260195.2	scaffold 1.92	14501	15346	-	ATGGCGCCCTATAGCATGGTACTCCTTGGCGCCCTCTCAATCCTTGGGTTTGGGGCTTATGCTCAAGAGGCTGCGGTTGAGGAACCCCAGATATTTTTCAACTTGACCTACACGGAATATCTGGATAAGGTGGCAGCATCCCACGGGAGTTCCCAGACGAGTGATTTGCCGTGGAATGACACTATGAGCGGCTTTCCTGGGAACGAGACGGGCAGCAGCCTATCGAGGCGTGGTCGCATTGTCAACCTTGGAAAGCGTGACCCTGTCGGCGGGGAGTCTTTCAATGATCGTGTCACCAATGACATGCTCCAGGCGCTTCATGGTCTCTGCGTTGAAAATTTTGGCACAGGCTTTCGAGCGACTAATGGGTACTGTCGCGCTAACCGTCGGGCGACTAGG…
F. oxysporum f. sp. cubense II5 (race TR4)	B	FOIG_16557	GCA_000260195.2	scaffold 1.92	16114	16941	-	ATGGCGCCCTATAGCATGGTACTCCTTGGCGCCCTCTCAATCCTTGGGTTTGGGGCTTATGCTCAAGAGGCTGCGGTTGAGGAACCCCAGATATTTTTCAACTTGACCTACACGGAATATCTGGATAAGGTGGCAGCATCCCACGGGAGTTCCCAGACGAGTGATTTGCCGTGGAATGACACTATGAGCGGCTTTCCTGGGAACGAGACGGGCAGCAGCCTATCGAGGCGTGGTCGCATTGTCAACCTTGGAAAGCGTGACCCTGTCGGCGGGGAGGCTCACAACAATCGCGTCACCAATGACATGCTCCAGGCGCTTCATGATCTGTGTGTTGAAGCATATGGCACAGGCTGGCGAGCGATTAGTGGGTCGTGTCAAGACCAGGCAACGAGGCGTATC…
F. oxysporum f. sp. cubense II5 (race TR4)	C	FOIG_16627	GCA_000260195.2	scaffold 1.101	2639	3478	+	ATGGCGCCTTATGGCATAGTACTCCTCGGCATCCTCTCAATCCTTGGGTCGGCGGCTTATGCTCAAGAGGCTGCAGTTCAGGAACCCCAGGTATTTTTCAACTTAACCTATGATGAATATCTGGATAAGGTGGCAGCATCTTCTGGGAGTGTCCCAGATAACAGTGATTTGCCCTGGGATGACACTATGAGCAGCCTTCCTTCAAACGAGACGTACGATAGTGTTCAGACCGAGACGAGCAGCAGCCTATCGAGGCGTGGTCGCGTTTTCAATCTCGGAAAGCGTGAGCCTGTCGGCGGGGAGACTCAAAACGATCAGGTCACCAATGATATGCTCCAGGCGCTTCATGGTCTGTGTGTTGAAAAATATGGCACAGGCTGGCGAGCGGTTAGTGGGATA…
F. oxysporum f. sp. cubense N2 (race 1)	-	FOC1_g10001632	GCA_000350345.1	scaffold 344	25559	26392	+	ATGGCGCCCTATAGCATGGTACTCCTTGGCGCCCTCTCAATCCTTGGGTTTGGGGCTTATGCTCAAGAGGCTGCGGTTGAGGAACCCCAGATATTTTTCAACTTGACCTACACGGAATATCTGGATAAGGTGGCAGCATCCCACGGGAGTTCCCAGACGAGTGATTTGCCGTGGAATGACACTATGAGCGGCTTTCCTGGGAACGAGACGGGCAGCAGCCTATCGAGGCGTGGTCGCATTGTCAACCTTGGAAAGCGTGTCCCTGTCGGCGGGGAGTCTTTCAACGATCGTGTCACCAATGACATGCTCCAGGCGCTTCATGGTCTCTGCGTTGAAAATTTTGGCACAGGCTTTCGAGCGACTAATGGGTACTGTCGCCCTAACCGTCGGGCGACTAGG…
F. oxysporum f. sp. lagenariae	-	N/A	NJCJ01000000	contig 43	1036	1887	-	ATGGCGCCCTATGGCATGGTACTCCTCGGTACCCTCTCAGTCCTTGGGATTGCGGCTTATGCTCAAGAGGCTGCGGTTCGGGAACCCCAGATATTTTTCAACTTGACCTACGCGGAACATCTGGATAAGGTGGCAGCAGCCTCTGGTCGGAGTCCCCCAGACAACAGTGATTTACCCTGGGATGACACTATGAGCAGCTTCCCTTGGAACGAGACAGACAATGATGTTCAGGCCGAGACGGGCAACAGCCTATCGAGGCGTGGTCGCGTTGTCAACCTTAAGAAGCGGGACCCTGTCGGCGGGGAGACTCTCAACGATCATGTCACCAATGACATGCTCCAGGCACTTCATGATCTGTGCGTTGGAAAATATGGCACAGGCTGGCGAGCGACTAGTGGG…
F. oxysporum f. sp. lycopersici 4287	-	FOXG_16418	GCA_000149955.2	scaffold 2.36	116409	117263	+	ATGGCGCCCTATAGCATGGTACTCCTTGGCGCCCTCTCAATCCTTGGGTTTGGGGCTTATGCTCAAGAGGCTGCGGTTCGGGAGCCCCAGATATTTTTCAACTTGACCTACACGGAATATCTGGATAAGGTGGCAGCATCCCACGGGAGTCCCCCAGACAAGAGTGATTTGCCCTGGAATGACACTATGGGCAGCTTTCCTGGAAACGAGACGGACGATGGTGTCCAGACCGAGACGGGCAGCAGCCTATCGAGGCGTGGTCACATTGTCAACCTTAGAAAGCGTGAGCCTTTCGGGGAGGAGTCTCGCAACGATCGTGTCACACAAGACATGCTCCAGGCGCTTCATGATCTGTGCGTTGAAAGATTTGGCACAGGCTATCGAGCGGTTAGTGGGTTA…
F. oxysporum f. sp. melongenae 001	A	N/A	NJCC01000000	contig 782	4425	5270	-	ATGGCGCCCTATAGCATGGTACTTCTTGGCGCCCTCTCGATCCTTGGGTTTGGGGCTTATGCTCAAGAGGCTGCGGTTCGGGAACCCCAGATATTCTTCAACTTGACCTTCACGGAATATCTGGATAAGGTGGCAGCATCCCACGGGAGCCCCCCAGACAAGAGTGATTTGCCCTGGAATGACACTATGAGCAGCTTTCCTGGAAACGAGACGGACGATGGCGTTCAGACCGAGACGGGCAGCAGCCTATCGAGGCGTGGTCACATTGTCAACCTTGGAAAGCGTGAGATTGTCGGCGAGGAGCATCGCAACGGTCGCGTCACCAATGACATGCTCCAGGCGCTTCATGATCTGTGCGTTGAAGCATTTGGCACAGGCTGGCGAGCGTATAGCGGGCTT…
F. oxysporum f. sp. melongenae 001	B	N/A	NJCC01000000	contig 996	603	1463	+	ATGGCGCCCTATAGCATGGTACTCCTTGGCGCCCTCTCGATCCTTGGGTTTGGGGCTTATGCTCAAGAGGCTGCGGTTCGGGAACCCCAGATATTCTTCAACTTGACCTTTACGGAATATCTGGATAAGGTGGCAGAATCCCACGGGAGCCCCCCAGACAAGAGTGATTTGCCCTGGAATGACACTATGAGCAGCTTTCCTGGAAACGAGACGGACGATGGTGTTCAGACCGAGACGGGCAGCAGCCTATCGAGGCGTGGTCACATTGTCAACCTTGGAAAGCGTGAGATTGTCGGCGGGGAGTCTCGCAACGATGCTGTCACCAATCACATGCTCCAGGTGCTTCATGATATTTGCGTTGAAAGATTTGGACCTGGCTGGCGAGCGGTTAAAGGGTAT…
F. oxysporum f. sp. melonis NRRL26406	-	FOMG_19530	GCA_000260495.2	scaffold 1.5	2010	2861	-	ATGGTGCCCTATGGCATGGTACTCCTCGGCATCCTCTCAGTCCTTGGGTCTGCGGCTTATGCTCAAGAGGCTGCGGTTCGGGAACCCCAGATATTTTTCAACTTGACCTACGCGGAACATCTGGATAAGGTGGCAGCAGCCTCTGGTCGGAGTCCCCCAGACAACAGTGATTTGCCCTGGGATGACACTATGAGCAGCTTCCCTTGGAACGAGACAGACAATGATGTTCAGGCCGAGACGGGCAACAGCCTATCGAGGCGTGGTCGCGTTGTCAACCTTAAGAAGCGGGACCCTGTCGGCTGGGAGACTCTCAACGATCATGTCACCAATGACATGCTCCAGGCGCTTCATGATCTGTGCGTTCAAAAATTTGGCGCAGGCCATCGAGCGACTAGTGGG…
F. oxysporum f. sp. melonis 010	A	N/A	MALD01000000	contig 2468	802	1641	+	ATGGCGCCCTATAGCATGGTATTCCTCGGCGCCCTCTCAATCCTTGGGTCTGCGGCTTATGCTCAAGAGGCTGCGCTTCCGAAACCCCAGATATTTTTCAACTTAACCTACACGGAACATCTCGATAAGGTGGCAGCCGCATCTGGAAGTATCCCAGACAACAGTGATTTGCCCTGGGATGAGACTATTAGCAGCATTCCTTGGAATGAGATGGACGACGATGTTCAGACCGAGACGGGCAGCAGCCTATCGAGGCGTGGTCGCATTTCCAACCTTGGAAAGCGTGAGCCTGTCGGCGGGGAGACTCGCAACGATGCTGTCGCCAATGACATGCTCCAGGCGATTCATGGTCTGTGCGTTGAAAGATTTGGCACAGGCCATCGAGCGGCTAGTGGGAGG…
F. oxysporum f. sp. melonis 010	B	N/A	MALD01000000	contig 2368	845	1696	+	ATGGTGCCCTATGGCATGGTACTCCTCGGCATCCTCTCAGTCCTTGGGTCTGCGGCTTATGCTCAAGAGGCTGCGGTTCGGGAACCCCAGATATTTTTCAACTTGACCTACGCGGAACATCTGGATAAGGTGGCAGCAGCCTCTGGTCGGAGTCCCCCAGACAACAGTGATTTGCCCTGGGATGACACTATGAGCAGCTTCCCTTGGAACGAGACAGACAATGATGTTCAGGCCGAGACGGGCAACAGCCTATCGAGGCGTGGTCGCGTTGTCAACCTTAAGAAGCGGGACCCTGTCGGCTGGGAGACTCTCAACGATCATGTCACCAATGACATGCTCCAGGCGCTTCATGATCTGTGCGTTCAAAAATTTGGCGCAGGCCATCGAGCGACTAGTGGG…
F. oxysporum f. sp. momordicae	-	N/A	NJCB01000000	contig 315	1272	2123	-	ATGGCGCCCTATGGCATGGTACTCCTCGGTACCCTCTCAGTCCTTGGGATTGCGGCTTATGCTCAAGAGGCTGCGGTTCGGGAACCCCAGATATTTTTCAACTTGACCTACGCGGAACATCTGGATAAGGTGGCAGCAGCCTCTGGTCGGAGTCCCCCAGACAACAGTGATTTACCCTGGGATGACACTATGAGCAGCTTCCCTTGGAACGAGACAGACAATGATGTTCAGGCCGAGACGGGCAACAGCCTATCGAGGCGTGGTCGCGTTGTCAACCTTAAGAAGCGGGACCCTGTCGGCGGGGAGACTCTCAACGATCATGTCACCAATGACATGCTCCAGGCACTTCATGATCTGTGCGTTGGAAAATATGGCACAGGCTGGCGAGCGACTAGTGGG…
F. oxysporum f. sp. physalis KOD886	-	N/A	NJBW01000000	contig 98	1913	2770	-	ATGGCGCCCTATAGCATGGTACTTCTTGGCGCTCTCTCGATCCTTGGGTTTGGGGCTTATGCTCAAGAGGCTGCGGTTCGGGAACCCCAGATATTTTTCAACTTGACCTTTACGGAATATCTGGATAAGGTGGCAGAATCCCACGGGAGCCCCCCAGACAAGAGTGATTTGCCCTGGAATGACACTATGAGCAGCTTTCCTGGAAACGAGACGGACGATGGTGTTCAGACCGAGACGGGCAGCAGCCTATCGAGGCGTGGTCACATTGTCAACCTTGGAAAGCGTGAGATTGTCCGCGGGGAGTCTCGCAACGATGCTGTCACCAATGACATGCTCCAGGTGCTTCATAATATTTGCGTTGAAAGATTTGGAACTGGCTGGCGAGCGGTTGGCGGGTAT…
F. oxysporum f. sp. pisi HDV247	A	FOVG_19730	GCA_000260075.2	scaffold 1.281	937	1785	-	ATGGCGCCCTATAGCATGGTACTCCTCGGCACCCTCTCAATCCTTGGGTCTGCGGCCTATGCTCAAGAGGCTGCGGTTCGAGAACCCCAGATATTTTTCAACTTGACCTACACGGAACATCTAGATAAGGTGGCAGCATCCTCTGGGAGTCCCCCAGACAACATTGATTTGCCCTGGGATGACACTATGACCAGCTTTCCTTGGAACGGGACGGACGATGGTGTTCAGACCGAGACGGGCAGCAGCCTATCGAGGCGTGGTCGCATTTCCAACCTTGGAAAGCGTGACCCTGTCGGCGGGGAGACTCGCAACGATGCTGTCACCAATGACATGCTCCAGGCGATTCACGGTCTGTGCGTTGAAAGGTTTGGCACAGGCTGGCGAGCGGCTAGTGGGTCG…
F. oxysporum f. sp. pisi HDV247	B	FOVG_19815	GCA_000260075.2	scaffold 1.315	630	1472	+	ATGGCGCCCTATAGCATGGTACTTCTCGGCACCCTCTCAATCTTTGGGTTTGCGGCTTATGCTCAAGACGCTGCGGTTCGGGAACCCCAGATATTTTTCAACTTGACCTACACGGAACATCTGGCTAAGGTGGCAGCATCCTCTGGGGGGAGTGTCCCAGACAACAGTGATTTGCCCTGGGATGACACGATGAGCAGCTTTCCTTGGAACGGAACGGACGATGGTAATCAGACCGAGGCGGGCAGCAGCCTATCGAGGCGTGGTCGTATTTTCAAGCTTGGAAAGCGTGACCCTGTCGGCGGGGAGTCTCGCAACGATGCTGTCACCAATGACATGCTCCAGGCGCTTCATGATCTGTGCGTTGATACACATGGCACAGGCTGGCGAGCGTCTTATGGG…
N/A: not available. These genomes have not been annotated with predicted genes.
